# Supplementary material
Source: PubMed Central journal article supplement (PMC8100539)
Supplement: ONCO-26-e898-s002.pdf [file ONCO-26-e898-s002.pdf]

Supplemental Figures for:  
Risk of COVID-19 in patients with cancer receiving immune checkpoint inhibitors  
Yevgeniy R. Semenov et al.

**Figure S1. Study flow diagram**

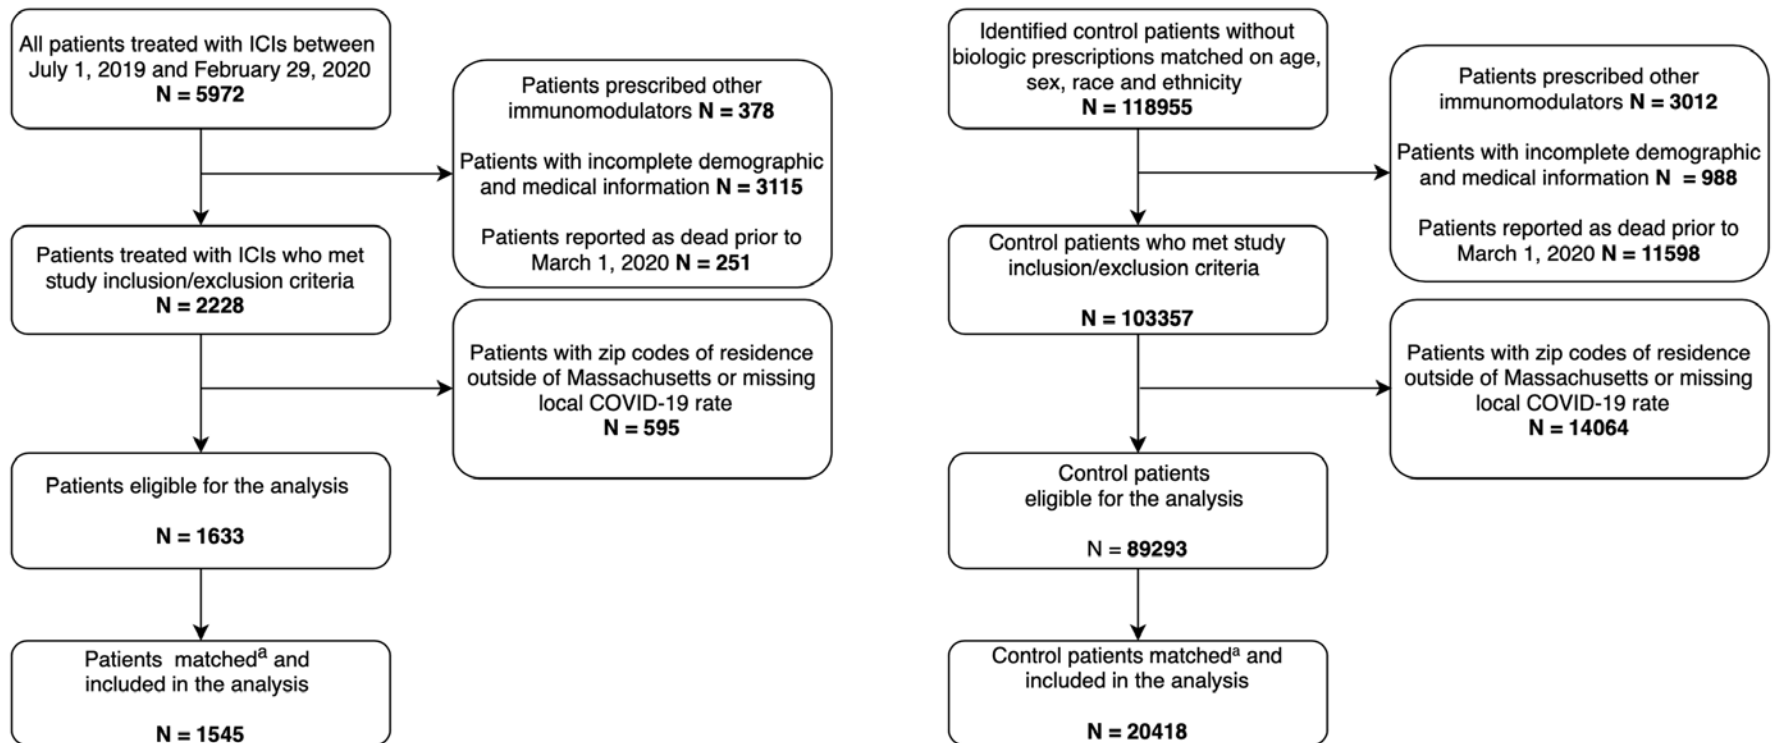

<sup>a</sup> patients were matched on age, sex, race and ethnicity, and cancer category (hematologic or solid organ)
